# Supplementary material for: The Physical Health Care Fidelity Scale: Psychometric Properties
Source: Springer Nature journal article supplement (doi:10.1007/s10488-020-01019-0), 2020-02-08
Supplement: MOESM1 [file 17662356]

**Table 4\* (online). Percentage exact agreement and interrater reliability\*\* for items and criteria: Independent pairs of rating of 13 sites at 4 times for items 1-6 and for 95 patient records for items 7-17**

| #        | Items (1-17) and criteria (a-e)                                  | Agreement   | ICC/Kappa** |
|----------|------------------------------------------------------------------|-------------|-------------|
|          | <b>Policies Subscale items and criteria</b>                      |             |             |
| <b>1</b> | <b>Policy promoting physical fitness</b>                         | <b>65 %</b> | <b>.90</b>  |
| a        | Coordinator for fitness activities                               | 87 %        | .68         |
| b        | Fitness coordinator negotiates gym                               | 84 %        | .88         |
| c        | Physical activities are made known                               | 90 %        | .75         |
| d        | Help to track physical activities                                | 94 %        | .74         |
| <b>2</b> | <b>Practical help to physical activities</b>                     | <b>81 %</b> | <b>.88</b>  |
| a        | Physical activity groups at least twice a week                   | 96 %        | .88         |
| b        | Physical fitness room or help to use a gym                       | 92 %        | .57         |
| c        | Exercise options for various patient preferences                 | 90 %        | .57         |
| d        | Exercise groups offered at suitable times                        | 98 %        | .88         |
| <b>3</b> | <b>Policy supporting healthy diet</b>                            | <b>69 %</b> | <b>.88</b>  |
| a        | Policy and information on healthy diet                           | 85 %        | .68         |
| b        | No sugary beverages or junk food on premises                     | 94 %        | .74         |
| c        | Meals on premises are mainly nutritious                          | 100 %       | 1.00        |
| d        | Unit has collaboration with a dietician                          | 92 %        | .73         |
| e        | Unit provides access to cooking classes                          | 94 %        | .79         |
| <b>4</b> | <b>Policy supporting smoking cessation</b>                       | <b>62 %</b> | <b>.89</b>  |
| a        | Policy and information on no-smoking                             | 92 %        | .83         |
| b        | Smoking cessation regular topic in consultations                 | 75 %        | .47         |
| c        | Unit offers support for smoking cessation                        | 87 %        | .65         |
| d        | Nicotine patches or gums are accessible                          | 93 %        | .77         |
| <b>5</b> | <b>Policy supporting dental health</b>                           | <b>79 %</b> | <b>.92</b>  |
| a        | Policy and information on dental health                          | 88 %        | .75         |
| b        | Procedures for monitoring dental health                          | 94 %        | .88         |
| c        | Toothbrush, toothpaste and dental floss available                | 96 %        | .89         |
| d        | Assists appointment with dental hygienist or dentist             | 92 %        | .46         |
| <b>6</b> | <b>Collaboration and communication with GP</b>                   | <b>77 %</b> | <b>.85</b>  |
| a        | Policy of regular communication with GP and others involved      | 87 %        | .51         |
| b        | Policy on regular information exchanged with GP                  | 83 %        | .65         |
| c        | Routine electronic transfer of information with GP and others    | 96 %        | .85         |
| d        | Collaboration with a specialists or unit in internal medicine    | 98 %        | .94         |
|          | <b>Practices Subscale items and criteria</b>                     |             |             |
| <b>7</b> | <b>Support for regular physical activities</b>                   | <b>96 %</b> | <b>0.80</b> |
| a        | Plan for physical activities documented in patient records       | 93 %        | .76         |
| b        | Exercise plan approved by a physician                            | 92 %        | .67         |
| c        | Patient has been offered to join a group for physical activities | 88 %        | .75         |
| d        | Methods to track physical activities discussed with patient      | 96 %        | .73         |
| e        | Review of exercises done by patient is documented                | 70 %        | .39         |
| <b>8</b> | <b>Monitoring of physical health conditions</b>                  | <b>93 %</b> | <b>.85</b>  |
| a        | Physical examinations documented in defined place in records     | 93 %        | .85         |
| b        | Results of all laboratory or other tests easily accessible in    | 92 %        | .75         |
| c        | No more than 6 months since last documented physical             | 88 %        | .76         |
| d        | Follow up of physical health is planned, and it is followed up   | 77 %        | .49         |
| <b>9</b> | <b>Documented collaboration with GP</b>                          | <b>84 %</b> | <b>.66</b>  |

|           |                                                                 |             |            |
|-----------|-----------------------------------------------------------------|-------------|------------|
| a         | Communication with GP is documented in patient record           | 86 %        | .72        |
| b         | Information from GP documented in a specified place in          | 85 %        | .42        |
| c         | List of current medications in a defined place and easily       | 93 %        | .63        |
| d         | Documented medication to GP after discharge or change           | 93 %        | .85        |
| e         | Documented who is responsible for medical follow up             | 76 %        | .51        |
| <b>10</b> | <b>Documented support for healthy diets</b>                     | <b>96 %</b> | <b>.58</b> |
| a         | Documented going through a full diet assessment with patient    | 95 %        | .26        |
| b         | Documented staff suggesting healthy food choices for patient    | 90 %        | .55        |
| c         | Documented help to join a cooking classes for healthy food      | 96 %        | .58        |
| <b>11</b> | <b>Monitoring BMI and waist circumference</b>                   | <b>99 %</b> | <b>.90</b> |
| a         | Patient educated about BMI and overweight/underweight           | 97 %        | .38        |
| b         | Weight recorded or attempted recorded each month or no          | 85 %        | .64        |
| c         | BMI calculated and discussed with patient at least once         | 94 %        | .72        |
| d         | Waist circumference has been measured at least once             | 96 %        | .81        |
| e         | Weight change/stability discussed with patient                  | 85 %        | .62        |
| f         | Patient encouraged to track weight                              | 97 %        | .78        |
| g         | Patient receives recognition for reaching target weight         | 97 %        | -.01       |
| <b>12</b> | <b>Assessment and treatment of obesity or malnutrition</b>      | <b>89 %</b> | <b>.64</b> |
| a         | Assessment done whether patient is obese or at risk for obesity | 76 %        | .52        |
| b         | Assessment for sleep apnea has been done and documented         | 99 %        | .66        |
| c         | Referred to specialist or GP within a month if high BMI         | 87 %        | .68        |
| d         | If obesity, treatment for obesity is followed by unit, GP or    | 78 %        | .44        |
| e         | Patient has met with dietician for overweight, or no obesity    | 87 %        | .61        |
| <b>13</b> | <b>Assessment and treatment of hypertension</b>                 | <b>93 %</b> | <b>.85</b> |
| a         | Blood pressure documented measured at least once                | 98 %        | .96        |
| b         | Treatment of hypertension followed up, or no hypertension       | 91 %        | .81        |
| c         | Documented who is following blood pressure, or no               | 94 %        | .87        |
| <b>14</b> | <b>Assessment and regulation of blood sugar</b>                 | <b>89 %</b> | <b>.79</b> |
| a         | Blood sugar measured at least once                              | 95 %        | .89        |
| b         | If medication or risk, blood sugar is measured monthly          | 89 %        | .79        |
| c         | If elevated blood sugar, treatment followed by unit, GP or      | 91 %        | .81        |
| d         | Documented who is following up blood sugar, or not elevated     | 87 %        | .75        |
| <b>15</b> | <b>Assessment and regulation of blood lipids</b>                | <b>94 %</b> | <b>.87</b> |
| a         | Blood lipids have been measured at least once                   | 98 %        | .96        |
| b         | If elevated blood lipids, treatment followed by unit, GP or     | 95 %        | .89        |
| c         | Documented who is following up blood lipids, or not elevated    | 95 %        | .89        |
| <b>16</b> | <b>Interventions for smoking cessation</b>                      | <b>93 %</b> | <b>.66</b> |
| a         | Patient has been asked about tobacco use                        | 91 %        | .81        |
| b         | If smoker, health risk has been discussed, or not smoking       | 89 %        | .61        |
| c         | Educated about support for smoking cessation, or not smoking    | 95 %        | .71        |
| d         | Smoking cessation program offered, including nicotine patches   | 94 %        | .74        |
| <b>17</b> | <b>Monitoring of dental health</b>                              | <b>98 %</b> | <b>.85</b> |
| a         | Checkup/dental cleaning by dentist/dental hygienist at least    | 88 %        | .67        |
| b         | Received information on oral hygiene in relation to medication  | 95 %        | .73        |
| c         | Brushing twice daily and use of dental floss                    | 98 %        | .90        |
| d         | Application for free dentist has been sent or approved          | 91 %        | .36        |
|           | <b>Summary for items (like in Table 2):</b>                     |             |            |
|           | <b>Average agreement and ICC for items 1-6 (Policies)</b>       | <b>72 %</b> | <b>.89</b> |
|           | <b>Average agreement and Kappa for items 6-17 (Practices)</b>   | <b>93 %</b> | <b>.77</b> |

|                                            |                                                         |                          |                             |                             |
|--------------------------------------------|---------------------------------------------------------|--------------------------|-----------------------------|-----------------------------|
|                                            | <b>Average agreement for all 17 items</b>               |                          | <b>86 %</b>                 |                             |
|                                            | <b>Summaries for criteria:</b>                          |                          |                             |                             |
|                                            | <b>Average for criteria of Policies items</b>           |                          | <b>91 %</b>                 | <b>.74</b>                  |
|                                            | <b>Average for criteria of Practices items</b>          |                          | <b>91 %</b>                 | <b>.67</b>                  |
|                                            | <b>Average for criteria of the total fidelity scale</b> |                          | <b>91 %</b>                 | <b>.70</b>                  |
| <b>Distribution of ratings of criteria</b> |                                                         |                          |                             |                             |
|                                            | <b>Exact agreement</b>                                  | <b>Policies criteria</b> | <b>Prescriber Practices</b> | <b>Total fidelity scale</b> |
|                                            | 60- 69 %                                                | 0                        | 0                           | 0                           |
|                                            | 70-79 %                                                 | 1                        | 5                           | 6                           |
|                                            | 80-89 %                                                 | 7                        | 12                          | 19                          |
|                                            | 90-100 %                                                | 17                       | 30                          | 47                          |
|                                            | <b>Cohen's Kappa</b>                                    | <b>Policies criteria</b> | <b>Prescriber Practices</b> | <b>Total fidelity scale</b> |
|                                            | Poor (< .21)                                            | 9                        | 1                           | 1                           |
|                                            | Fair (.21 - .40)                                        | 9                        | 4                           | 4                           |
|                                            | Moderate (.41 - .60)                                    | 5                        | 8                           | 13                          |
|                                            | Substantial (.61 - .74)                                 | 7                        | 14                          | 21                          |
|                                            | Excellent (.75 – 1.00)                                  | 13                       | 20                          | 33                          |

\*) Table 4 also contains the results for items reported in Table 2 in the paper, so that these here in Table 4 may be seen together with the results for the criteria.

\*\*\*) ICC for items rated 1-5 and Cohen's Kappa for patient records rated passed/failed and for criteria rated passed/failed.
