# Supplementary material for: The Physical Health Care Fidelity Scale: Psychometric Properties
Source: Springer Nature journal article supplement (doi:10.1007/s10488-020-01019-0), 2020-02-08
Supplement: MOESM2 [file 17662356]

**Table 5 (online). Criteria passed for Policies items (Item 1-6) for 13 sites at 18 months, and patient records and criteria passed for 126 patient records reviewed at 13 sites at 18 months for Practices items (Item 7-17) \*\*. Mean fidelity is reported in parenthesis for each item.**

| <b>Items</b> | <b>Policies Subscale items and criteria</b>                       | <b>Failed</b> | <b>Passed</b> |
|--------------|-------------------------------------------------------------------|---------------|---------------|
| <b>1</b>     | <b>Policy promoting physical fitness (3.23)</b>                   |               |               |
| a            | Coordinator for fitness activities                                | 3             | 10            |
| b            | Fitness coordinator negotiates gym                                | 9             | 4             |
| c            | Physical activities are made known                                | 1             | 12            |
| d            | Help to track physical activities                                 | 10            | 3             |
| <b>2</b>     | <b>Practical help to physical activities (4.54)</b>               |               |               |
| a            | Physical activity groups at least twice a week                    | 2             | 11            |
| b            | Physical fitness room or help to use a gym                        | 2             | 11            |
| c            | Exercise options for various patient preferences                  | 1             | 12            |
| d            | Exercise groups offered at suitable times                         | 1             | 12            |
| <b>3</b>     | <b>Policy supporting healthy diet (3.23)</b>                      |               |               |
| a            | Policy and information on healthy diet                            | 2             | 11            |
| b            | No sugary beverages or junk food on premises                      | 1             | 12            |
| c            | Meals on premises are mainly nutritious                           | 0             | 13            |
| d            | Unit has collaboration with a dietician                           | 10            | 3             |
| e            | Unit provides access to cooking classes                           | 10            | 3             |
| <b>4</b>     | <b>Policy supporting smoking cessation (3.62)</b>                 |               |               |
| a            | Policy and information on no-smoking                              | 4             | 9             |
| b            | Smoking cessation regular topic in consultations                  | 4             | 9             |
| c            | Unit offers support for smoking cessation                         | 7             | 6             |
| d            | Nicotine patches or gums are accessible                           | 3             | 10            |
| <b>5</b>     | <b>Policy supporting dental health (4.08)</b>                     |               |               |
| a            | Policy and information on dental health                           | 5             | 8             |
| b            | Procedures for monitoring dental health                           | 4             | 9             |
| c            | Toothbrush, toothpaste and dental floss available                 | 3             | 10            |
| d            | Assists appointment with dental hygienist or dentist              | 0             | 13            |
| <b>6</b>     | <b>Collaboration and communication with GP* (3.77)</b>            |               |               |
| a            | Policy of regular communication with GP* and others involved      | 1             | 12            |
| b            | Policy on regular information exchanged with GP*                  | 6             | 7             |
| c            | Routine electronic transfer of information with GP* and others    | 0             | 13            |
| d            | Collaboration with a specialists or unit in internal medicine     | 9             | 4             |
|              | <b>Practices Subscale items and criteria **</b>                   | <b>Failed</b> | <b>Passed</b> |
| <b>7</b>     | <b>Support for regular physical activities (1.85)</b>             | 100           | 26            |
| a            | Plan for physical activities documented in patient records        | 93            | 33            |
| b            | Exercise plan approved by a physician                             | 97            | 29            |
| c            | Patient has been offered to join a group for physical activities  | 85            | 41            |
| d            | Methods to track physical activities discussed with patient       | 115           | 11            |
| e            | Review of exercises done by patient is documented                 | 62            | 64            |
| <b>8</b>     | <b>Monitoring of physical health conditions (3.31)</b>            | 61            | 65            |
| a            | Physical examinations documented in defined place in records      | 54            | 72            |
| b            | Results of laboratory or other tests easily accessible in records | 18            | 108           |
| c            | No more than 6 months since last documented physical exam.        | 60            | 66            |
| d            | Follow up of physical health is planned, and it is followed up    | 82            | 44            |

|           |                                                                   |     |     |
|-----------|-------------------------------------------------------------------|-----|-----|
| <b>9</b>  | <b>Documented collaboration with GP* (3.23)</b>                   | 60  | 66  |
| a         | Communication with GP* is documented in patient record            | 40  | 86  |
| b         | Information from GP* documented in a specified place in           | 87  | 39  |
| c         | List of current medications in a defined place and easily         | 5   | 121 |
| d         | Documented medication to GP* after discharge or change            | 53  | 73  |
| e         | Documented who is responsible for medical follow up               | 50  | 76  |
| <b>10</b> | <b>Documented support for healthy diets (1.46)</b>                | 108 | 18  |
| a         | Documented going through a full diet assessment with patient      | 116 | 10  |
| b         | Documented staff suggesting healthy food choices for patient      | 95  | 31  |
| c         | Documented help to join a cooking classes for healthy food        | 113 | 13  |
| <b>11</b> | <b>Monitoring BMI and waist circumference (1.54)</b>              | 107 | 19  |
| a         | Patient educated about BMI and overweight/underweight             | 116 | 10  |
| b         | Weight recorded or attempted recorded each month or no            | 85  | 41  |
| c         | BMI calculated and discussed with patient at least once           | 103 | 23  |
| d         | Waist circumference has been measured at least once               | 106 | 20  |
| e         | Weight change/stability discussed with patient                    | 91  | 35  |
| f         | Patient encouraged to track weight                                | 100 | 26  |
| g         | Patient receives recognition for reaching target weight           | 113 | 13  |
| <b>12</b> | <b>Assessment and treatment of obesity or malnutrition (1.77)</b> | 97  | 29  |
| a         | Assessment done whether patient is obese or at risk for obesity   | 71  | 55  |
| b         | Assessment for sleep apnea has been done and documented           | 123 | 3   |
| c         | Referred to specialist or GP* within a month if high BMI          | 89  | 37  |
| d         | If obesity, treatment for obesity is followed by unit/GP*/others  | 85  | 41  |
| e         | Patient has met with dietician for overweight, or no obesity      | 96  | 30  |
| <b>13</b> | <b>Assessment and treatment of hypertension 3.15)</b>             | 62  | 64  |
| a         | Blood pressure documented measured at least once                  | 57  | 69  |
| b         | Treatment of hypertension followed up, or no hypertension         | 62  | 64  |
| c         | Documented who is following blood pressure, or no                 | 62  | 64  |
| <b>14</b> | <b>Assessment and regulation of blood sugar (3.92)</b>            | 46  | 80  |
| a         | Blood sugar measured at least once                                | 38  | 88  |
| b         | If medication or risk, blood sugar is measured monthly            | 43  | 83  |
| c         | If elevated blood sugar, treatment followed by unit, GP* or       | 42  | 84  |
| d         | Documented who is following up blood sugar, or not elevated       | 49  | 77  |
| <b>15</b> | <b>Assessment and regulation of blood lipids (3.00)</b>           | 65  | 61  |
| a         | Blood lipids have been measured at least once                     | 61  | 65  |
| b         | If elevated blood lipids, treatment followed by unit, GP* or      | 62  | 64  |
| c         | Documented who is following up blood lipids, or not elevated      | 65  | 61  |
| <b>16</b> | <b>Interventions for smoking cessation (1.62)</b>                 | 102 | 24  |
| a         | Patient has been asked about tobacco use                          | 71  | 55  |
| b         | If smoker, health risk has been discussed, or not smoking         | 98  | 28  |
| c         | Educated about support for smoking cessation, or not smoking      | 106 | 20  |
| d         | Smoking cessation program offered, including nicotine patches     | 102 | 24  |
| <b>17</b> | <b>Monitoring of dental health (1.46)</b>                         | 109 | 17  |
| a         | Checkup/dental cleaning by dentist/dental hygienist at least      | 98  | 28  |
| b         | Received information on oral hygiene in relation to medication    | 104 | 22  |
| c         | Brushing twice daily and use of dental floss                      | 105 | 21  |
| d         | Application for free dentist has been sent or approved            | 109 | 17  |

\*) GP = general practitioner. \*\*) For each patient record the item was rated passed if all but one of the criteria were rated passed, except for item 11 (5 of 7 needed) and items 13 and 15 (all 3 criteria needed).
